# Supplementary material for: CXCL5-secreting pulmonary epithelial cells drive destructive neutrophilic inflammation in tuberculosis
Source: JCI journal article supplement (doi:10.1172/jci72030), 2014-02-09
Supplement: sd1 [file 1]

|      | CFU  |      |       |
|------|------|------|-------|
|      | 100  | 500  |       |
| Ccr1 | 0.3  | 0.2  | 0.92  |
| Ccr2 | 1.6  | 1.1  | 0.49  |
| Ccr3 | -0.3 | -0.1 | 0.27  |
| Ccr4 | 0.0  | 0.1  | 0.68  |
| Ccr5 | 3.5  | 3.4  | 0.93  |
| Ccl2 | 4.3  | 3.7  | 0.76  |
| Ccl3 | 3.9  | 4.0  | 0.97  |
| Ccl4 | 5.0  | 6.2  | 0.004 |
| Ccl5 | 2.8  | 2.4  | 0.31  |
| Ccl6 | 0.2  | 0.7  | 0.002 |
| Ccl7 | 4.5  | 4.7  | 0.77  |
| Ccl8 | 4.8  | 4.7  | 0.91  |
| Ccl9 | 1.4  | 1.9  | 0.047 |

**B**

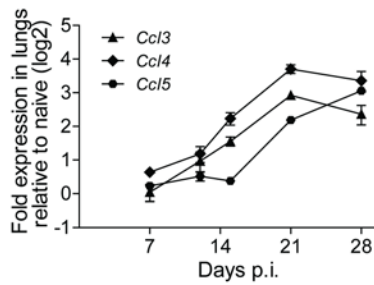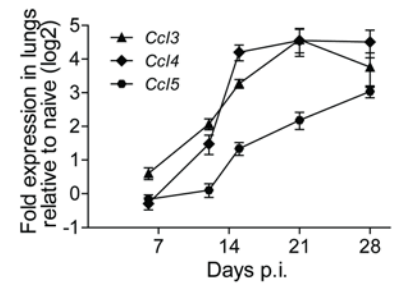

- 1 2 3 4 5 6

### Supplemental Figure 1

Expression of CC chemokine receptors and ligands in lungs of *Mtb*-infected mice. **(A)** Effect of *Mtb* infection dose on chemokine and chemokine receptor gene expression. Comparison of microarray gene expression data between low-dose infection (100 CFUs) naïve versus day 23 p.i. with *Mtb* and high-dose infection (500 CFUs) naïve versus day 21 p.i. Lungs from five WT mice pooled for microarray analysis. Experiment performed in duplicate with color swaps. Adjusted P-value corresponds to the interaction between dosage and infection. Increasing redness stands for increased upregulation. Increasing blueness stands for increased downregulation. **(B)** Expression of chemokine mRNA at different time points p.i. in WT lungs following low-dose (left) and high-dose (right) infection relative to naïve lungs (means  $\pm$  SEM;  $n_{\text{pooled}} \geq 8$ ). Data pooled from two independent experiments.

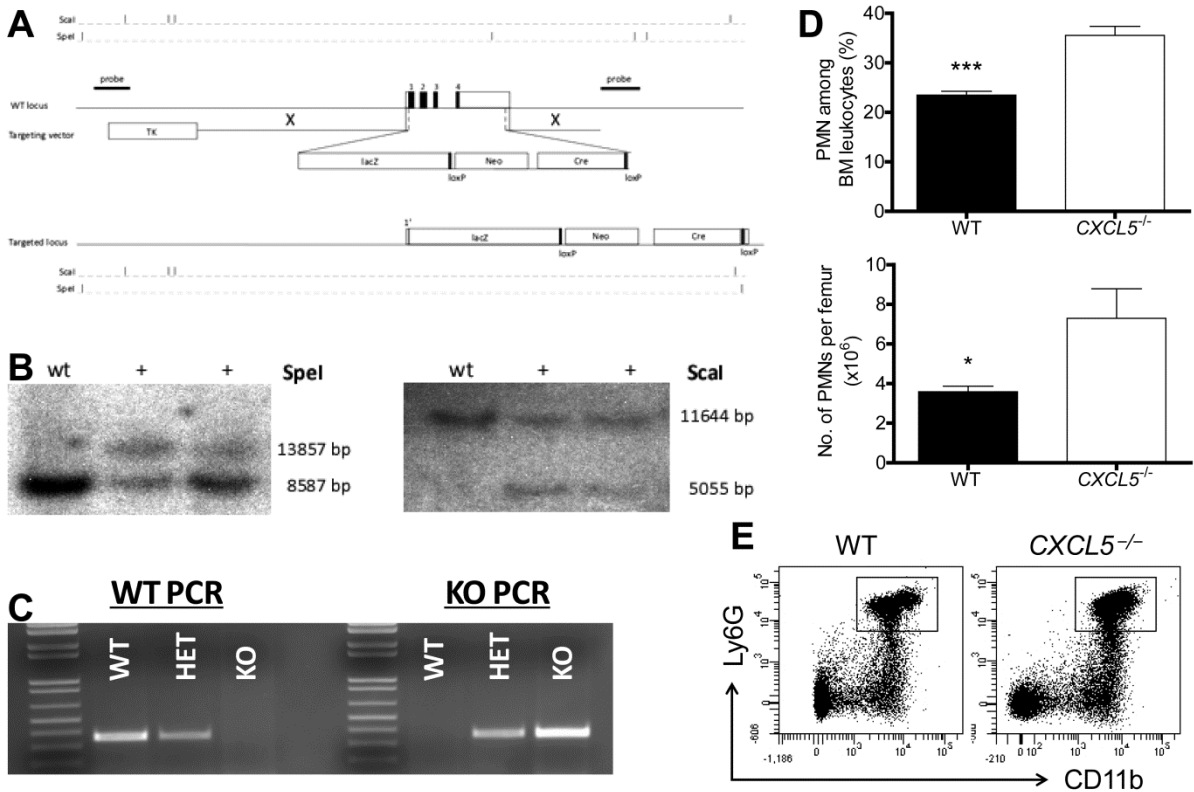

## Supplemental Figure 2

Targeted disruption of *Cxcl5* gene and phenotyping of *CXCL5*<sup>-/-</sup> mice. (**A–B**) Targeting strategy for the murine *Cxcl5* locus, for which boxes represent exons 1 – 4; empty boxes indicate 5' and 3' non-translated regions and filled boxes represent coding regions. The locations of the probes used for ES clone verification are shown, as well as representative Southern blots below (**B**) (WT = E14 ES cells; + = targeted clones). (**C**) Mouse genotyping; left WT PCR (Primer TP1\_FW: tacaagcattctcctccgatt and TP2\_RV: catccgcatgaatggcgagat) and right KO PCR (Primer TP1\_FW: tacaagcattctcctccgatt and TP3\_RV: ccttgggtcttctacatttct). In white, tail DNA from WT mice (WT), *CXCL5*<sup>+/-</sup> (HET) and *CXCL5*<sup>-/-</sup> (KO) mice. (**D**) Numbers and frequencies of PMNs among bone marrow leukocytes in naïve WT and *CXCL5*<sup>-/-</sup> mice determined by flow cytometry (means ± SEM; n = 5), unpaired *t*-test: \* *P* < 0.05; \*\*\* *P* < 0.001. (**E**) Dot plots showing gating of PMNs (Ly6G<sup>hi</sup>CD11b<sup>hi</sup>) in naïve WT and *CXCL5*<sup>-/-</sup> mice.

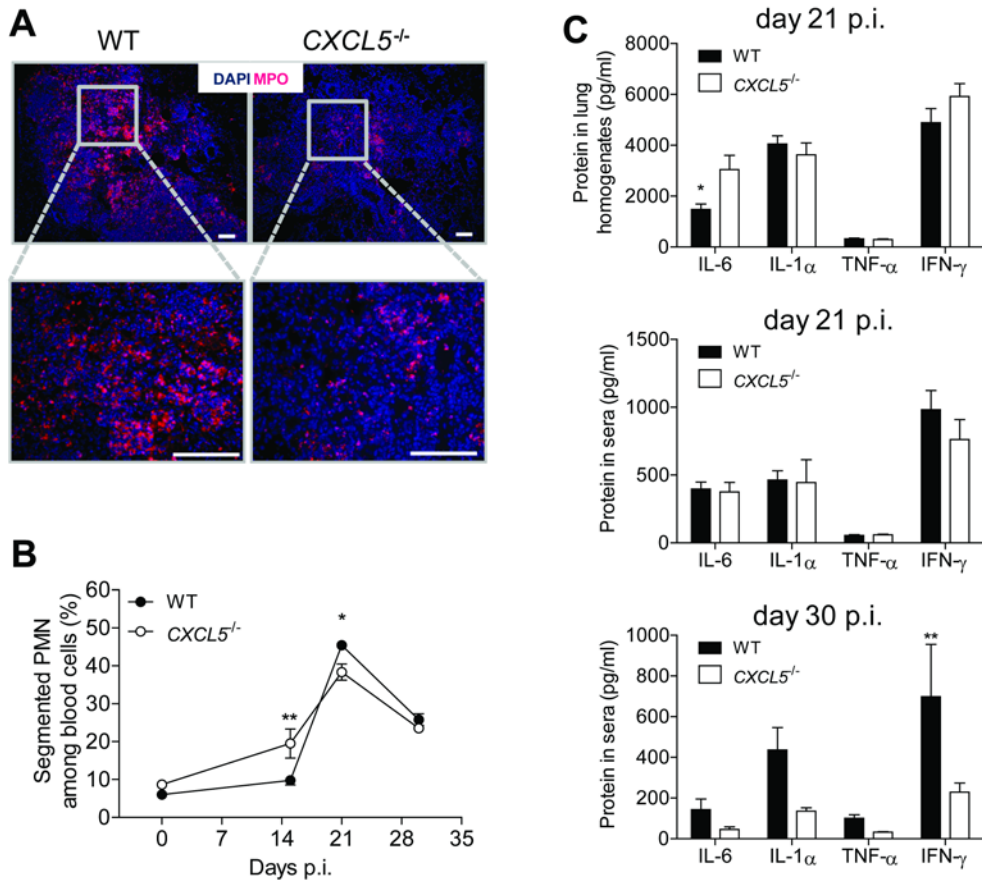

### Supplemental Figure 3

Secretion of proinflammatory cytokines in *Mtb*-infected *CXCL5*<sup>-/-</sup> mice. **(A)** Myeloperoxidase (MPO)-positive cells in lung tissue collected at 21 days p.i., scale bars 100 μm. Representative pictures from one out of three animals are shown. **(B)** Frequencies of segmented PMNs in blood smears from WT and *CXCL5*<sup>-/-</sup> mice after *Mtb* infection (means ± SEM;  $n_{\text{pooled}} = 10$ ). Data pooled from two independent experiments, two-way ANOVA/Bonferroni post-test. **(C)** Protein concentrations of IL-6, IL-1α, TNF-α and IFN-γ measured by multiplex analysis in lung homogenates and in sera of *Mtb*-infected WT and *CXCL5*<sup>-/-</sup> mice, at day 21 p.i. and day 30 p.i., respectively. Data pooled from two independent experiments (means ± SEM;  $n_{\text{pooled}} = 10$ ), unpaired *t*-test. **(A, C)** Significant differences indicated by asterisks: \*  $P < 0.05$ ; \*\*  $P < 0.01$ .

**A**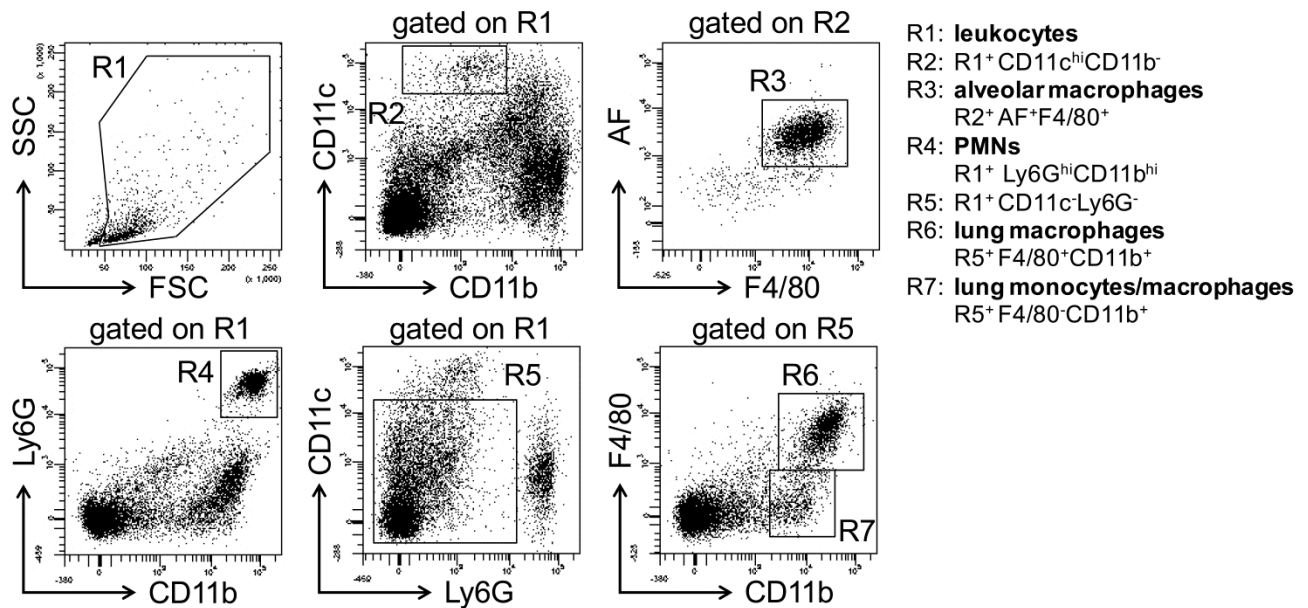**B**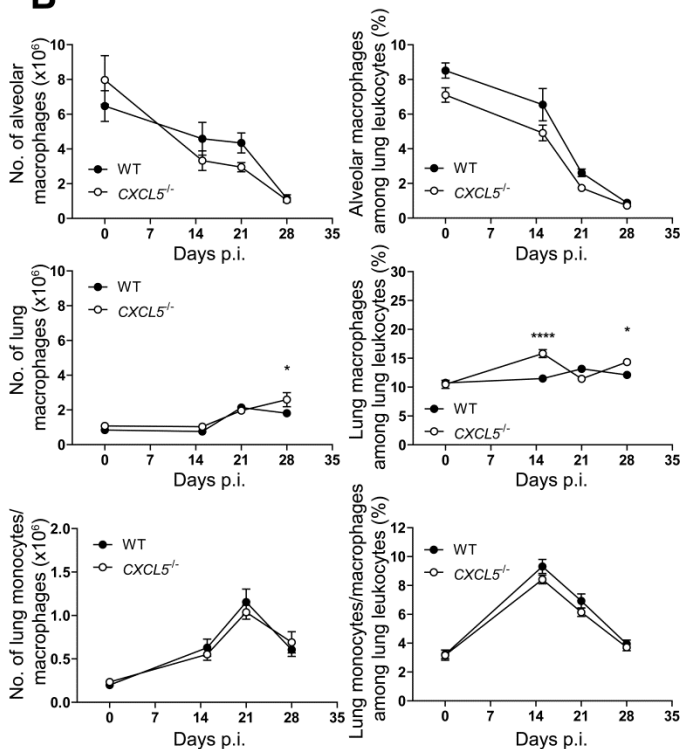**C**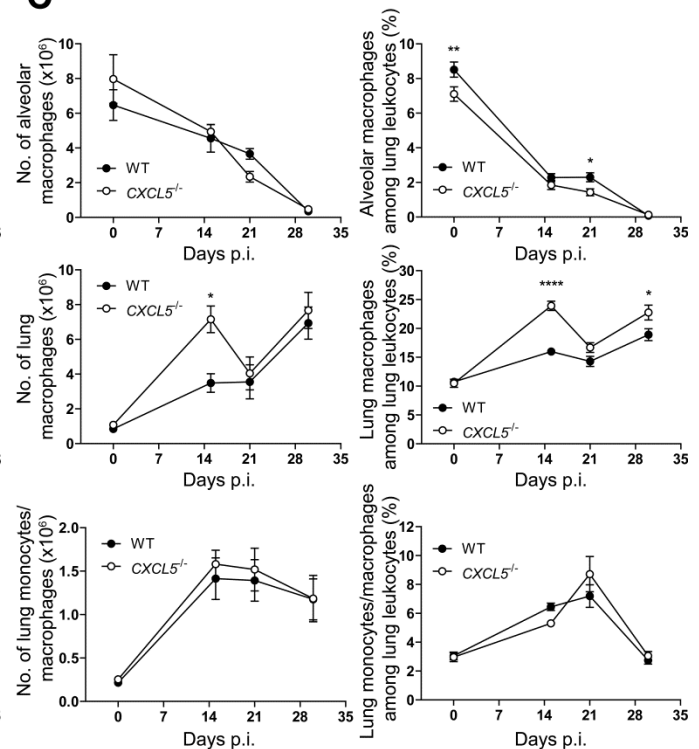**Supplemental Figure 4**

Macrophages and monocytes in lungs are not affected by absence of CXCL5. **(A)** Flow cytometric gating strategy applied for identification of innate cell populations: alveolar macrophages [leukocyte gate (R1)<sup>+</sup> CD11c<sup>hi</sup>CD11b<sup>-</sup> autofluorescence (AF)<sup>+</sup> F4/80<sup>+</sup>], PMN [leukocyte gate (R1)<sup>+</sup> Ly6G<sup>hi</sup>CD11b<sup>hi</sup>], lung macrophages [leukocyte gate (R1)<sup>+</sup> CD11c<sup>-</sup>Ly6G<sup>-</sup> F4/80<sup>+</sup>CD11b<sup>+</sup>], lung monocytes/macrophages [leukocyte gate (R1)<sup>+</sup> CD11c<sup>-</sup>Ly6G<sup>-</sup> F4/80<sup>-</sup>CD11b<sup>+</sup>]. **(B, C)** Numbers and frequencies of alveolar macrophages, lung macrophages and lung monocytes among lung leukocytes in naïve and low- **(B)** and high-dose **(C)** *Mtb*-infected WT and *CXCL5*<sup>-/-</sup> mice determined by flow cytometry (means ± SEM; n<sub>pooled</sub> = 10 mice per time point). Each time point shows pooled data from at least two independent experiments. Curve data pooled from a total of seven independent experiments, two-way ANOVA/Bonferroni post-test: \* *P* < 0.05; \*\* *P* < 0.01; \*\*\*\* *P* < 0.0001.

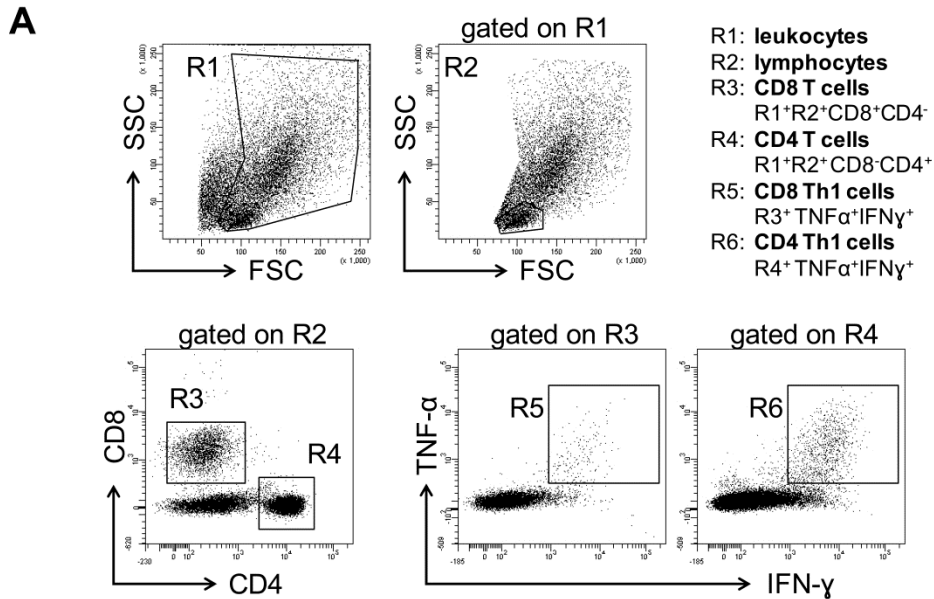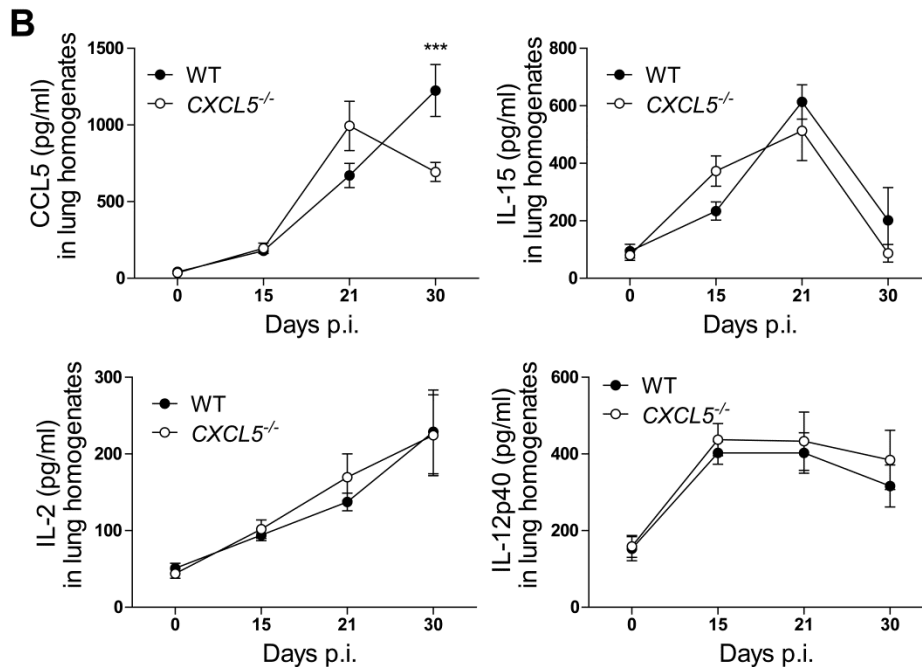

### Supplemental Figure 5

T cell response-associated cytokines and chemokines are not affected by lack of CXCL5. **(A)** Flow cytometric gating strategy applied to identify *Mtb*-specific IFN- $\gamma$ - and TNF- $\alpha$ -secreting CD4 and CD8 T cells. **(B)** Cytokine and chemokine measurements by multiplex analysis in lung homogenates of naïve and *Mtb*-infected WT and CXCL5<sup>-/-</sup> mice. Data pooled from two independent experiments (means  $\pm$  SEM;  $n_{\text{pooled}} = 10$ ), two-way ANOVA/Bonferroni post-test: \*\*\*  $P < 0.001$ .

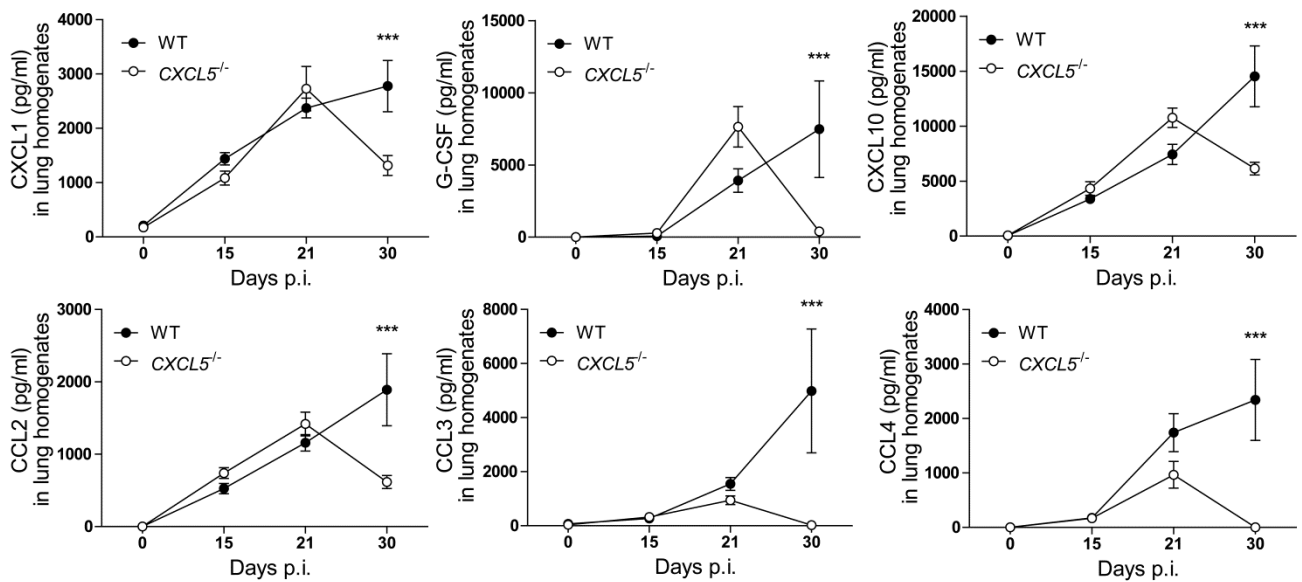

### Supplemental Figure 6

Chemoattractants in lung homogenates of *Mtb*-infected mice. Chemokine measurements by multiplex analysis in lung homogenates of naïve and *Mtb*-infected WT and *CXCL5*<sup>-/-</sup> mice (means  $\pm$  SEM;  $n_{\text{pooled}} = 10$ ). Data are pooled from two independent experiments, two-way ANOVA/Bonferroni post-test: \*\*\*  $P < 0.001$ .

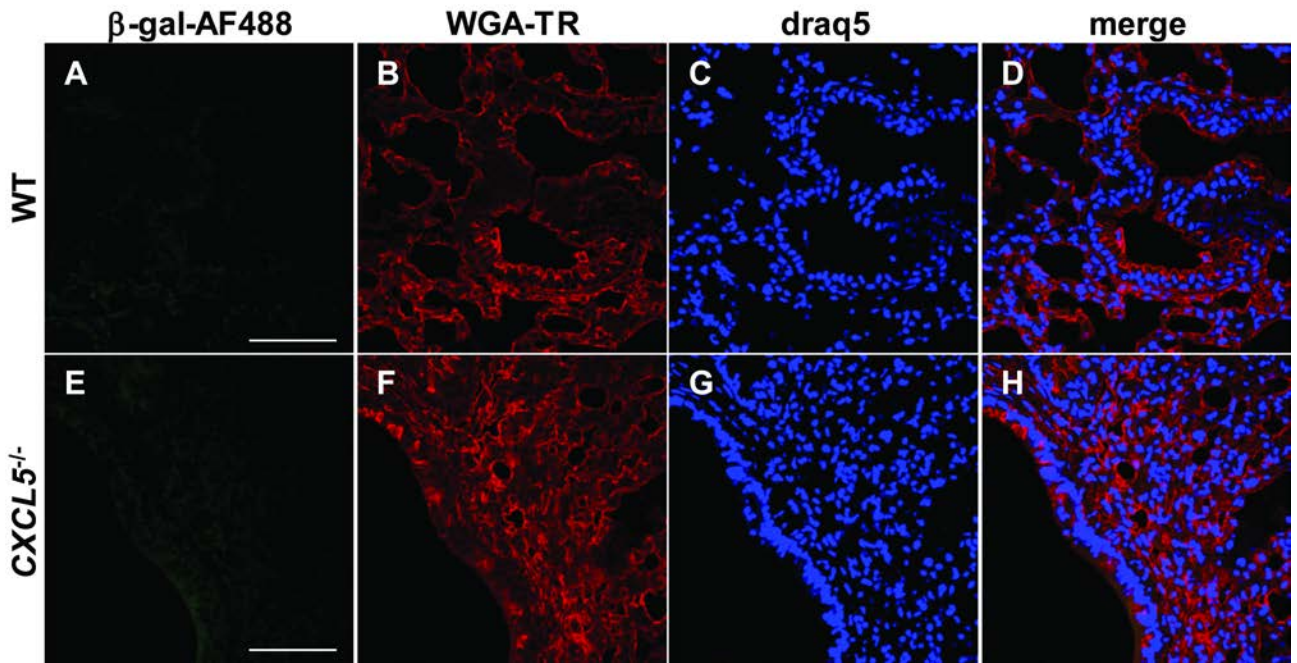

### Supplemental Figure 7

Absence of *in situ* CXCL5 expression in lungs of naïve mice. Lung tissue from naïve WT control (A–D) and CXCL5<sup>-/-</sup> mice (E–H) was stained for  $\beta$ -galactosidase ( $\beta$ -gal, AF488, green) with specific antiserum. Tissue was counterstained with wheat germ agglutinin (WGA, TexasRed, red) and draq5 (blue). No nuclear  $\beta$ -galactosidase staining and no unspecific granular staining pattern were observed. Scale bars 50  $\mu$ m (A–H). Representative confocal images from one experiment (n = 3).

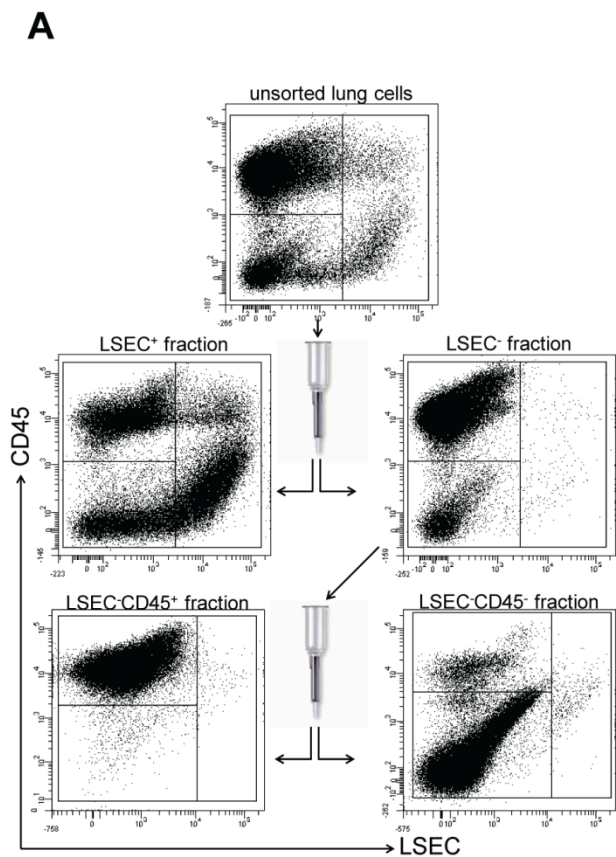

**B**

| unsorted lung cells                                              |              |
|------------------------------------------------------------------|--------------|
| endothelial cells (LSEC <sup>+</sup> )                           | 7.2% ± 1.1%  |
| leukocytes (LSEC <sup>-</sup> CD45 <sup>+</sup> )                | 71.6% ± 1.0% |
| epithelial cells and rest (LSEC <sup>-</sup> CD45 <sup>-</sup> ) | 21.0% ± 0.2% |
| LSEC <sup>+</sup> sorted fraction                                |              |
| endothelial cells (LSEC <sup>+</sup> )                           | 35.2% ± 3.8% |
| leukocytes (LSEC <sup>-</sup> CD45 <sup>+</sup> )                | 43.5% ± 3.1% |
| epithelial cells and rest (LSEC <sup>-</sup> CD45 <sup>-</sup> ) | 20.8% ± 1.4% |
| LSEC <sup>-</sup> CD45 <sup>+</sup> sorted fraction              |              |
| endothelial cells (LSEC <sup>+</sup> )                           | 0.33% ± 0.1% |
| leukocytes (LSEC <sup>-</sup> CD45 <sup>+</sup> )                | 98.2% ± 0.2% |
| epithelial cells and rest (LSEC <sup>-</sup> CD45 <sup>-</sup> ) | 1.2% ± 0.1%  |
| LSEC <sup>-</sup> CD45 <sup>-</sup> sorted fraction              |              |
| endothelial cells (LSEC <sup>+</sup> )                           | 1.2% ± 0.3%  |
| leukocytes (LSEC <sup>-</sup> CD45 <sup>+</sup> )                | 15.6% ± 4.2% |
| epithelial cells and rest (LSEC <sup>-</sup> CD45 <sup>-</sup> ) | 83.0% ± 3.9% |

Frequencies of gated cell population before and after MACS sort from *Mtb* infected WT lungs at day 21 p.i. (n = 3, mean ± SEM).

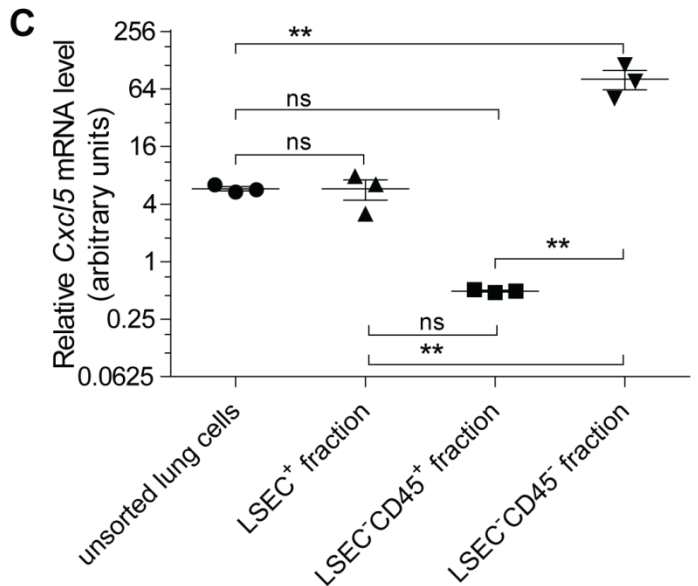

### Supplemental Figure 8

*Cxcl5* mRNA by MACS-sorted epithelial cell fraction. **(A)** Dot blots indicating two-step MACS sorting strategy. Cells from *Mtb* infected WT mice were sorted according to LSEC (endothelial cell marker) expression. Then, cells in the LSEC<sup>-</sup> fraction were sorted according to CD45 (leukocyte marker) expression. **(B)** Purity of sorted cell fractions (gating indicated in (A); endothelial cells (LSEC<sup>+</sup>), leukocytes (LSEC<sup>-</sup>CD45<sup>+</sup>) and epithelial cells plus rest (LSEC<sup>-</sup>CD45<sup>-</sup>) were analyzed by flow cytometry. **(C)** Relative *Cxcl5* mRNA abundance in sorted cell populations from high-dose *Mtb*-infected WT mice measured by quantitative RT-PCR of *Cxcl5* and *Gapdh* mRNA expression; [formula:  $1.8^{(ct\ Gapdh - ct\ Cxcl5)} \times 100$ ]; (means ± SEM, n = 3), one-way ANOVA/Bonferroni post-test. Data from one experiment. Significant differences indicated by asterisks: \*\* P < 0.01; ns, P > 0.05.
